# Supplementary material for: miRTissue ce: extending miRTissue web service with the analysis of ceRNA-ceRNA interactions
Source: PubMed Central journal article supplement (PMC7493844; doi:10.1186/s12859-020-3520-z), 2020-09-16
Supplement: 12859_2020_3520_MOESM1_ESM.pdf [file 12859_2020_3520_MOESM1_ESM.pdf]

## Use case 1: miRNA-target-protein analysis

### a) Compare Normal/Tumor miRNA-target interactions:

1. User can select one or more miRNA
2. User can select one or more gene Target
3. User can select one or more TCGA tissue
4. User can select Normal, Tumor or Normal & Tumor

The screenshot shows the 'miRNA-target-protein analysis' interface. On the left, there are four numbered selection steps: 1. Select miRNA(s) (hsa-miR-150, hsa-miR-1182), 2. Select Target(s) (BTLA, TFDP2), 3. Select TCGA Tissue(s) (CESC - Cervical squamous cell carcinoma & endocervical adenocarcinoma, COAD - Colon adenocarcinoma), and 4. Select Tissue Type (Normal, Tumor, Normal & Tumor). The main table displays results for two miRNAs across two tissues. The table has columns for miRNA, Gene, and p-values for CESC (Normal and Tumor) and COAD (Normal and Tumor). The results are as follows:

| miRNA        | Gene  | CESC NORMAL<br>mirna/gene<br>p-value | CESC TUMOR<br>mirna/gene<br>p-value | COAD NORMAL<br>mirna/gene<br>p-value | COAD TUMOR<br>mirna/gene<br>p-value |
|--------------|-------|--------------------------------------|-------------------------------------|--------------------------------------|-------------------------------------|
| hsa-miR-1182 | TFDP2 | 1                                    | 0.4233136                           | 1                                    | 0.2136576                           |
| hsa-miR-150  | BTLA  | 0.9494265                            | 2.314461e-35                        | 0.0006205503                         | 5.843321e-34                        |

Figure 1

### b) Details for a specific tumor type:

1. User can select one or more miRNA
2. User can select one or more gene Target
3. User can select only one TCGA tissue
4. User can select to show all interaction or only interactions where protein expression value is given
5. User can click on the value in the last column (number of ceRNA competitors) in order to visualize all ceRNA interactions that involve the selected miRNA and gene. (see use case 2a)

The screenshot shows the 'miRNA-target-protein analysis' interface with detailed results for BRCA tissue. The left sidebar shows: 1. Select miRNA(s) (hsa-miR-150), 2. Select Target(s) (empty), 3. Select TCGA Tissue (BRCA - Breast invasive carcinoma), and 4. Select what kind of miRNA-target to show (Show all interactions). The main table displays results for hsa-miR-150 across various genes in BRCA tissue. The table has columns for miRNA, Gene, BRCA protein antigen, BRCA mirna/gene correlation, BRCA mirna/gene p-value, BRCA gene/protein correlation, BRCA gene/protein p-value, Interaction Type, and Number of ceRNA interactions. The results are as follows:

| miRNA       | Gene   | BRCA protein antigen | BRCA mirna/gene correlation | BRCA mirna/gene p-value | BRCA gene/protein correlation | BRCA gene/protein p-value | Interaction Type | Number of ceRNA interactions |
|-------------|--------|----------------------|-----------------------------|-------------------------|-------------------------------|---------------------------|------------------|------------------------------|
| hsa-miR-150 | A1CF   |                      | +                           | 0.5065593               |                               |                           | No Interaction*  | 0                            |
| hsa-miR-150 | ABCB7  |                      | -                           | 0.4074191               |                               |                           | Degradation      | 77                           |
| hsa-miR-150 | ABCG8  |                      | -                           | 0.6896325               |                               |                           | Degradation      | 33                           |
| hsa-miR-150 | ABHD15 |                      | +                           | 0.6244975               |                               |                           | No Interaction*  | 0                            |
| hsa-miR-150 | ABHD18 |                      | +                           | 0.01335916              |                               |                           | No Interaction*  | 0                            |
| hsa-miR-150 | ABHD2  |                      | -                           | 0.243445                |                               |                           | Degradation      | 78                           |
| hsa-miR-150 | ACOT9  |                      | +                           | 0.01059544              |                               |                           | No Interaction*  | 0                            |

Figure 2

## Use case 2: ceRNA interactions analysis

### a) Compare among different tissues:

1. User can select one or more ceRNA (mRNA)
2. User can select one or more ceRNA (mRNA, lncRNA, pseudogene)
3. User can select one or more TCGA tissue
4. User can click on the p-value of a ceRNA interaction in order to visualize the list of shared miRNA (see use case 2b)

miRTissue miRNA-target-protein analysis ceRNA interactions analysis About

Show 10 entries Search:

1. Select ceRNA(s) A (mRNA)  
AGO2

2. Select ceRNA(s) B (mRNA/lncRNA/pseudogene)

3. Select TCGA Tissue(s)  
CESC - Cervical squamous cell carcinoma & endocervical adenocarcinoma  
BLCA - Bladder urothelial carcinoma

Show/Update Results

| ceRNA A | ceRNA B  | ceRNA B Biotype | BLCA ceRNA p-value | CESC ceRNA p-value |
|---------|----------|-----------------|--------------------|--------------------|
| All     | All      | All             | All                | All                |
| AGO2    | C1orf112 | protein_coding  |                    | 0.40108            |
| AGO2    | NFYA     | protein_coding  |                    | 0.40842            |
| AGO2    | M6PR     | protein_coding  | 0.4829             | 0.45297            |
| AGO2    | CYP26B1  | protein_coding  | 0.49897            | 0.24009            |
| AGO2    | CDC27    | protein_coding  | 0.49259            | 0.24349            |
| AGO2    | MYCBP2   | protein_coding  | 0.3241             |                    |
| AGO2    | PHTF2    | protein_coding  |                    | 0.3705             |

Figure 3

### b) Details for a specific tumor type

1. User can select one or more ceRNA (mRNA)
2. User can select one or more ceRNA (mRNA, lncRNA, pseudogene)
3. User can select only one TCGA tissue
4. User can click on the value of last column ("number of tissue having this ceRNA") in order to visualize the same ceRNA interaction in other tissues (see use case 2a)
5. User can click on a miRNA of the "list of miRNA" in order to visualize all the miRNA target and interaction type for the selected miRNA (see use case 1b)

miRTissue miRNA-target-protein analysis ceRNA interactions analysis About

Show 10 entries Search:

1. Select ceRNA(s) A (mRNA)  
CD44

2. Select ceRNA(s) B (mRNA/lncRNA/pseudogene)

3. Select TCGA Tissue  
BRCA - Breast invasive carcinoma

Show/Update Results

| ceRNA A | ceRNA B    | ceRNA B Biotype | BRCA ceRNA p-value | BRCA ceRNA mscor      | Number of shared miRNAs | List of shared miRNAs     | Number of tissues with ceRNA interaction |
|---------|------------|-----------------|--------------------|-----------------------|-------------------------|---------------------------|------------------------------------------|
| All     | All        | All             | All                | All                   | All                     | All                       | All                                      |
| CD44    | AC016831.7 | lincRNA         | 0.4762             | 0.00102374651715176   | 2                       | hsa-miR-192 / hsa-miR-373 | 2                                        |
| CD44    | ACVR2B     | protein_coding  | 0.4947             | 0.0000653792891735228 | 1                       | hsa-miR-192               | 2                                        |
| CD44    | ADRBK2     | protein_coding  | 0.47573            | 0.000412211840947252  | 1                       | hsa-miR-192               | 3                                        |
| CD44    | AFF4       | protein_coding  | 0.48161            | 0.000292413015386975  | 1                       | hsa-miR-211               | 3                                        |
| CD44    | AGAP1      | protein_coding  | 0.41117            | 0.00429092234167147   | 2                       | hsa-miR-143 / hsa-miR-211 | 2                                        |

Figure 4
